# Supplementary material
Source: PubMed Central journal article supplement (PMC5753038)
Supplement: EMBJ-37-63-s001.pdf [file EMBJ-37-63-s001.pdf]

## **APPENDIX**

### **Selective base excision repair of DNA damage by the non-base-flipping DNA glycosylase AlkC**

Rongxin Shi, Elwood A. Mullins, Xing-Xing Shen, Kori T. Lay, Philip K. Yuen, Sheila S. David, Antonis Rokas, and Brandt F. Eichman\*

**Appendix Table S1.** Crystallographic data collection and refinement statistics

**Appendix Table S2.** Base excision activities

**Appendix Figure S1.** AlkC $\alpha$  and AlkC $\beta$  sequence alignment

**Appendix Figure S2.** Substrate specificities of AlkC and AlkD

**Appendix Figure S3.** Glycosylase-induced DNA distortion

**Appendix Figure S4.** AlkC excision of 3mC and 1mA

**Appendix References**

**Appendix Table S1. Crystallographic data collection and refinement statistics**

|                                                         | SeMet-PfAlkC/THF-DNA                | PfAlkC/1aR-DNA          |
|---------------------------------------------------------|-------------------------------------|-------------------------|
| <b>Data collection</b>                                  |                                     |                         |
| Space group                                             | $P2_12_12_1$                        | $P6_1$                  |
| Cell dimensions                                         |                                     |                         |
| <i>a</i> , <i>b</i> , <i>c</i> (Å)                      | 80.6, 94.9, 134.0                   | 198.4, 198.4, 60.2      |
| $\alpha$ , $\beta$ , $\gamma$ (°)                       | 90.0, 90.0, 90.0                    | 90.0, 90.0, 120.0       |
| Resolution (Å)                                          | 50.00–2.40 (2.49–2.40) <sup>a</sup> | 100.00–1.80 (1.86–1.80) |
| <i>R</i> <sub>sym</sub>                                 | 0.109 (0.429)                       | 0.092 (0.490)           |
| Avg. <i>I</i> / $\sigma$ <i>I</i>                       | 23.0 (5.8)                          | 24.8 (5.3)              |
| Completeness (%)                                        | 99.7 (99.8)                         | 99.1 (97.1)             |
| Redundancy                                              | 9.8 (9.7)                           | 9.7 (9.1)               |
| Wilson <i>B</i> -factor (Å <sup>2</sup> )               | 25.2                                | 19.8                    |
| <b>Refinement</b>                                       |                                     |                         |
| Resolution (Å)                                          | 40.42–2.40 (2.46–2.40)              | 49.29–1.80 (1.82–1.80)  |
| No. reflections                                         | 40,519 (2,602)                      | 124,478 (3,819)         |
| <i>R</i> <sub>work</sub>                                | 0.168 (0.219)                       | 0.141 (0.177)           |
| <i>R</i> <sub>free</sub> <sup>b</sup>                   | 0.225 (0.333)                       | 0.164 (0.202)           |
| No. atoms <sup>c</sup>                                  |                                     |                         |
| Protein                                                 | 5,685                               | 5,718                   |
| DNA                                                     | 870                                 | 870                     |
| Solvent <sup>d</sup>                                    | 573                                 | 1,383                   |
| Avg. <i>B</i> -factors <sup>c,e</sup> (Å <sup>2</sup> ) |                                     |                         |
| Protein                                                 | 25.6                                | 23.0                    |
| DNA                                                     | 25.6                                | 25.1                    |
| Solvent <sup>d</sup>                                    | 29.2                                | 37.5                    |
| R.m.s. deviations                                       |                                     |                         |
| Bond lengths (Å)                                        | 0.008                               | 0.008                   |
| Bond angles (°)                                         | 0.967                               | 1.059                   |
| Ramachandran distribution (%)                           |                                     |                         |
| Favored                                                 | 97.6                                | 97.6                    |
| Allowed                                                 | 2.4                                 | 2.2                     |
| Disallowed                                              | 0.0                                 | 0.1                     |

<sup>a</sup> Statistics for the highest resolution shell are shown in parentheses.

<sup>b</sup> *R*<sub>free</sub> was determined from the 5% of reflections excluded from refinement.

<sup>c</sup> Riding hydrogen atoms were not included in no. atoms or avg. *B*-factors.

<sup>d</sup> In addition to water molecules, values for solvent include one PEG 4000 molecule in the THF structure and two Na<sup>+</sup> ions, two pentaerythritol propoxylate, two glycerol, and three MES molecules in the 1aR structure.

<sup>e</sup> Equivalent isotropic *B*-factors were calculated in conjunction with TLS-derived anisotropic *B*-factors.

**Appendix Table S2. Base excision activities <sup>a</sup>**

|              | <b>7mG</b>               | <b>3mC</b>           | <b>1mA</b>           |
|--------------|--------------------------|----------------------|----------------------|
| BcAlkD       | $1.3 \times 10^{-2}{}^b$ | $6.1 \times 10^{-7}$ | n.d. <sup>c</sup>    |
| BcAlkC       | $1.5 \times 10^{-5}$     | $1.7 \times 10^{-4}$ | $6.9 \times 10^{-6}$ |
| PfAlkC       | $2.4 \times 10^{-5}$     | $5.2 \times 10^{-4}$ | $2.4 \times 10^{-5}$ |
| PfAlkC E121A |                          | n.d.                 | n.d.                 |
| PfAlkC E156A |                          | n.d.                 | n.d.                 |
| PfAlkC W164A |                          | $6.1 \times 10^{-5}$ | $5.6 \times 10^{-6}$ |

<sup>a</sup> Values are single-turnover rate constants ( $\text{s}^{-1}$ ), averaged from three independent measurements. Errors (SD) were between 10-20% for each.

<sup>b</sup> From Parsons et al (2016) *J. Am. Chem. Soc.*, 138: 11485-8.

<sup>c</sup> n.d., none detected.

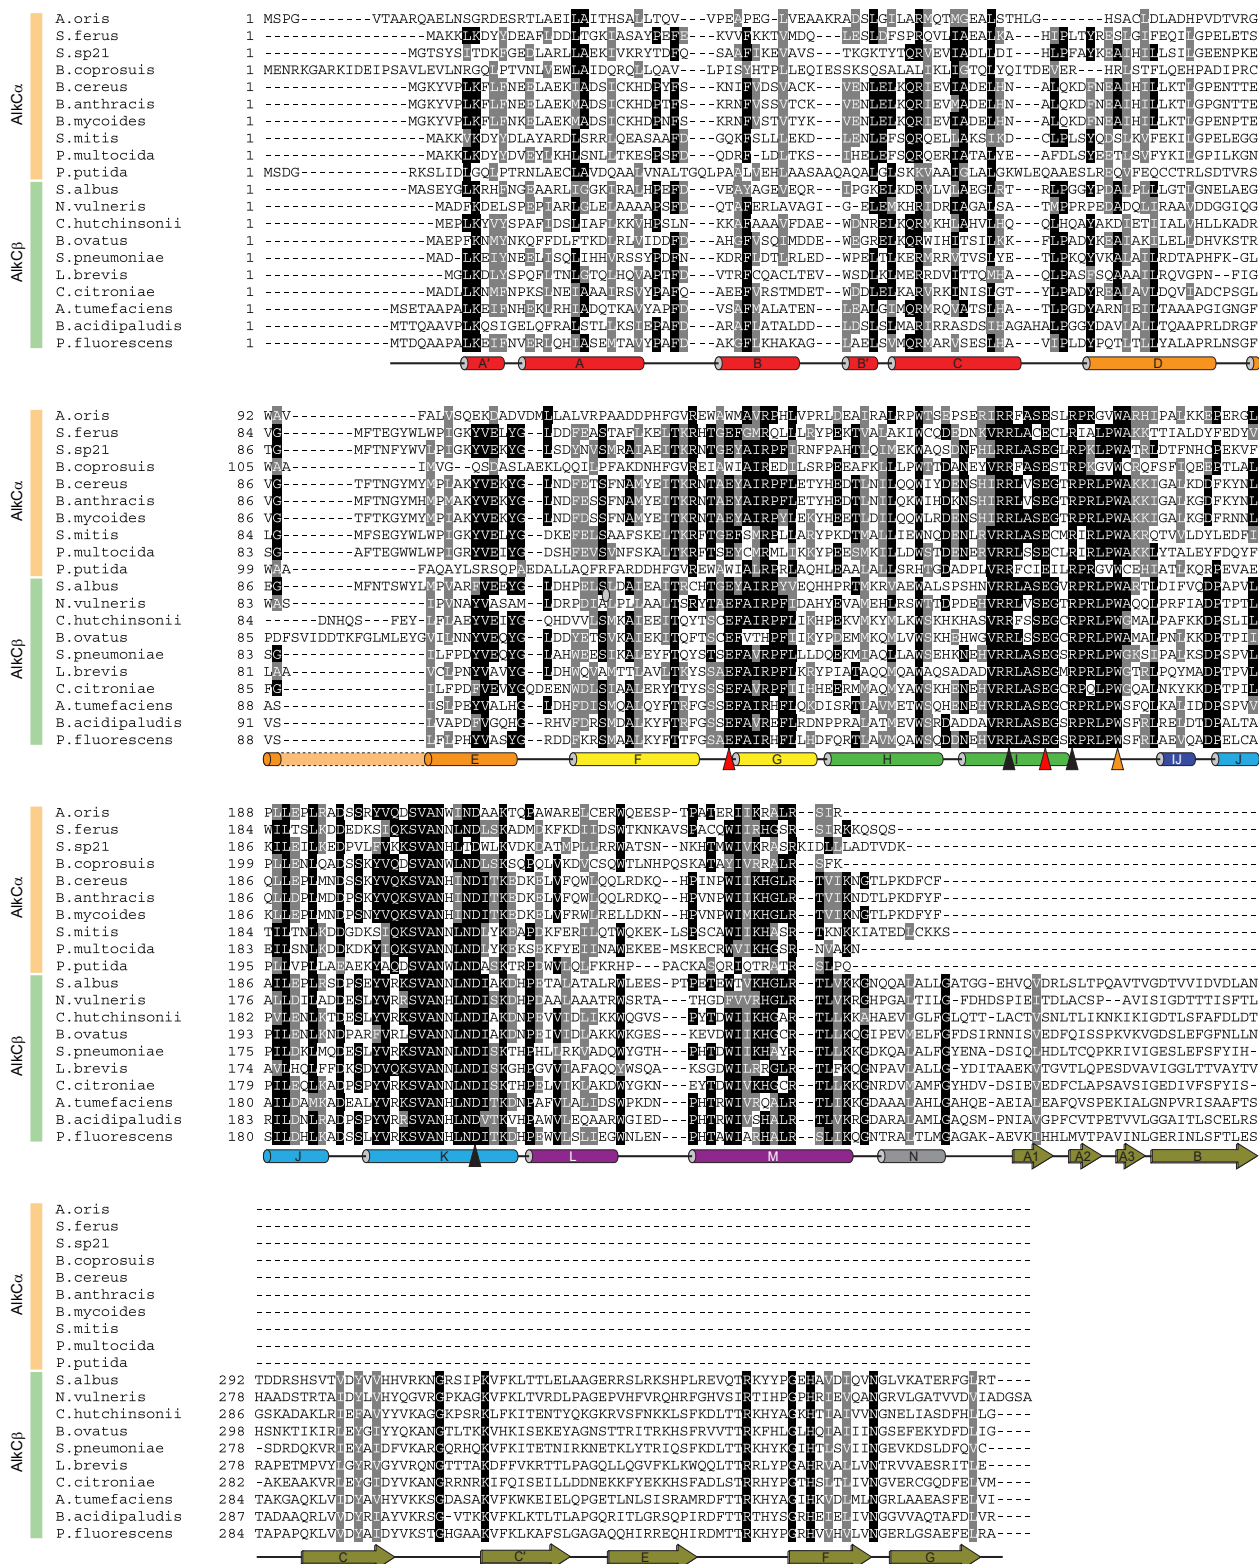

**Appendix Figure S1. AlkCα and AlkCβ sequence alignment.** Twenty selected sequences from four representative phyla (Actinobacteria, Bacteroidetes, Firmicutes and Proteobacteria) were aligned using Clustal Omega and annotated using BoxShade ([http://www.ch.embnet.org/software/BOX\\_form.html](http://www.ch.embnet.org/software/BOX_form.html)). Shaded residues have >50% sequence identity (black) and similarity (grey). Secondary structural elements identified from the PfAlkC crystal structure are shown below the sequences. Triangles designate PfAlkC residues important for base excision activity (red), nucleobase binding (orange) and for stabilizing the DNA backbone in the vicinity of the lesion (black).

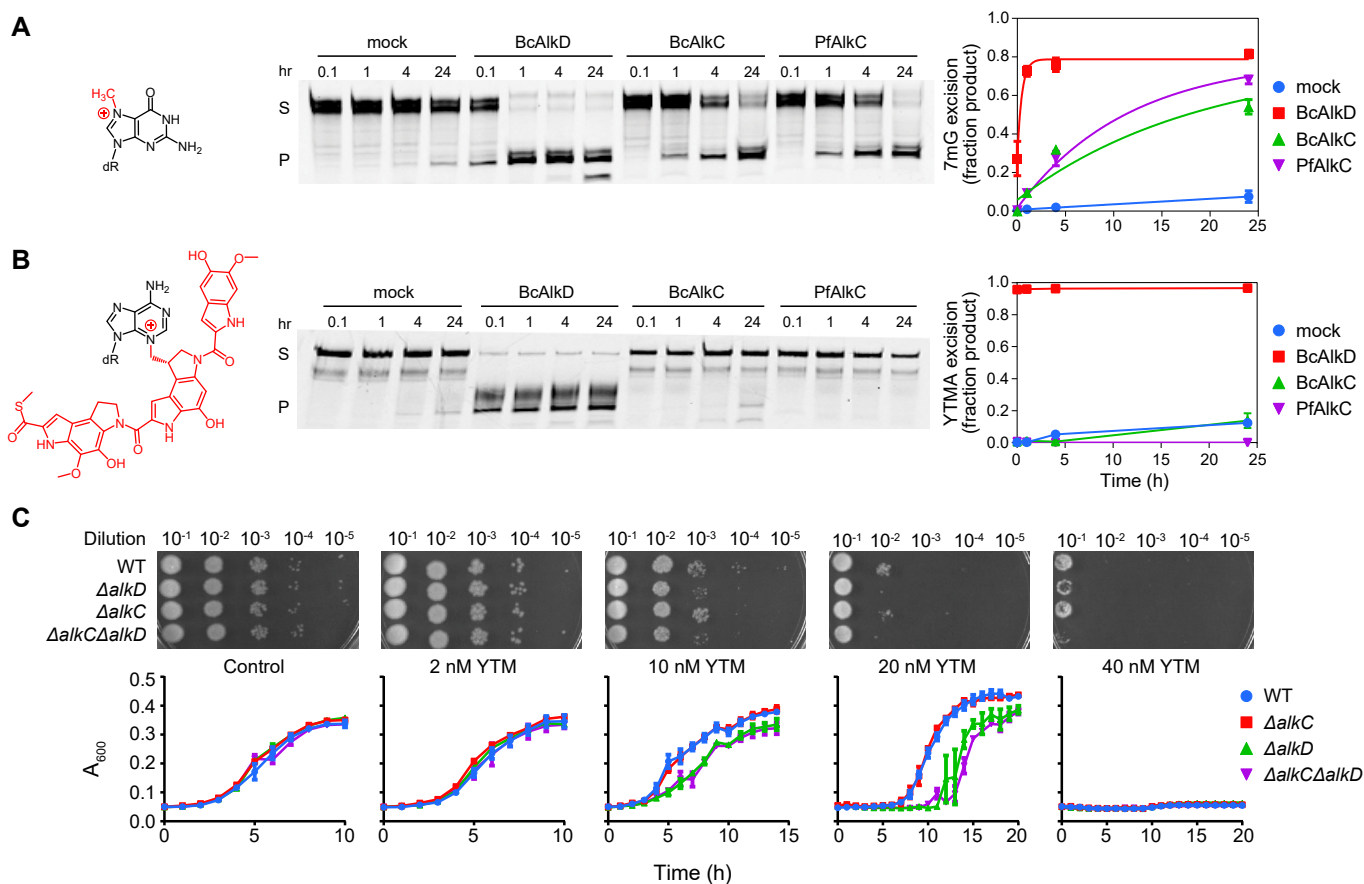

**Appendix Figure S2. Substrate specificities of AlkC and AlkD.** **A,B.** Excision activity of BcAlkD and PfAlkC against oligodeoxynucleotides containing 7mG (A) and YTMA (B). Representative denaturing polyacrylamide gels show substrates (S) and hydroxide-nicked products (P) as a function of time. Quantification of the data is shown on the right; values are mean  $\pm$  SD ( $n=3$ ). The extra band below the 12-mer product in panel a corresponds to a nuclease contaminant in the AlkD preparation. The smearing in the AlkD-YTMA product band is a result of incompletely denatured GC-rich duplex DNA after hydroxide nicking. **C.** Growth of *B. anthracis* wild-type (blue),  $\Delta alkC$  (red),  $\Delta alkD$  (green), and  $\Delta alkC\Delta alkD$  (purple) in the presence of varying concentrations of yatakemycin (YTM). *Bacillus anthracis*  $\Delta alkC$  cells were generated and their resistance to YTM assayed as described for  $\Delta alkD$  (Mike et al, 2014; Mullins et al, 2015; Stauff & Skaar, 2009). Briefly, growth curves were obtained by growing cell cultures in the presence or absence of YTM and recording cell density every hour for 20 hours. Spot assays were performed by serial dilution of early-mid-log phase cells on LB plates prepared with or without YTM. Growth curves and spot assays were performed in triplicate.

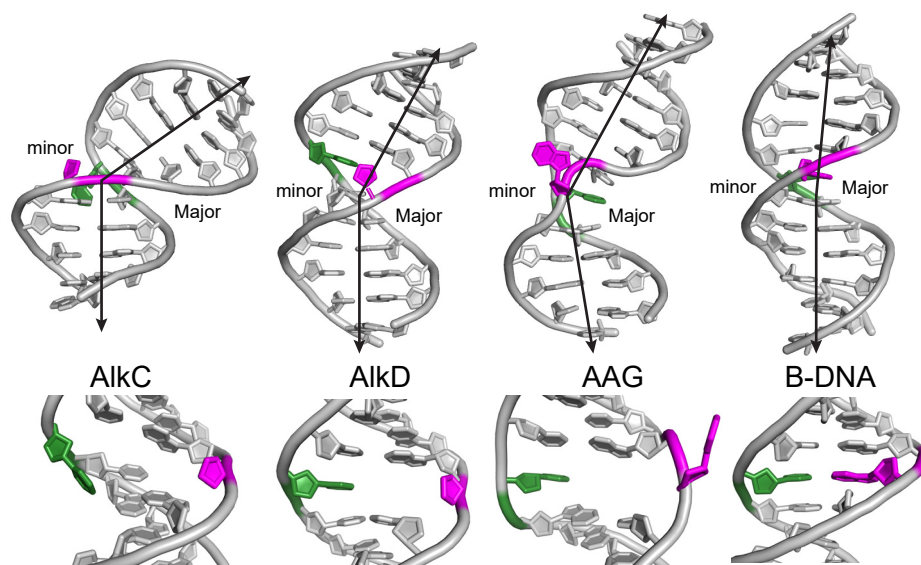

**Appendix Figure S3. Glycosylase-induced DNA distortion.** DNA models from glycosylase-DNA co-crystal structures of PfAlkC/1aR-DNA (this work), BcAlkD/1aR-DNA (PDB 5KUB), and base-flipping human AAG/1,*N*<sup>6</sup>-ethenoadenine-DNA (PDB 1EWN) compared to unbound B-DNA (PDB 1BNA). The modified and partner nucleotides are colored magenta and green, respectively. Black arrows depict the helical axes

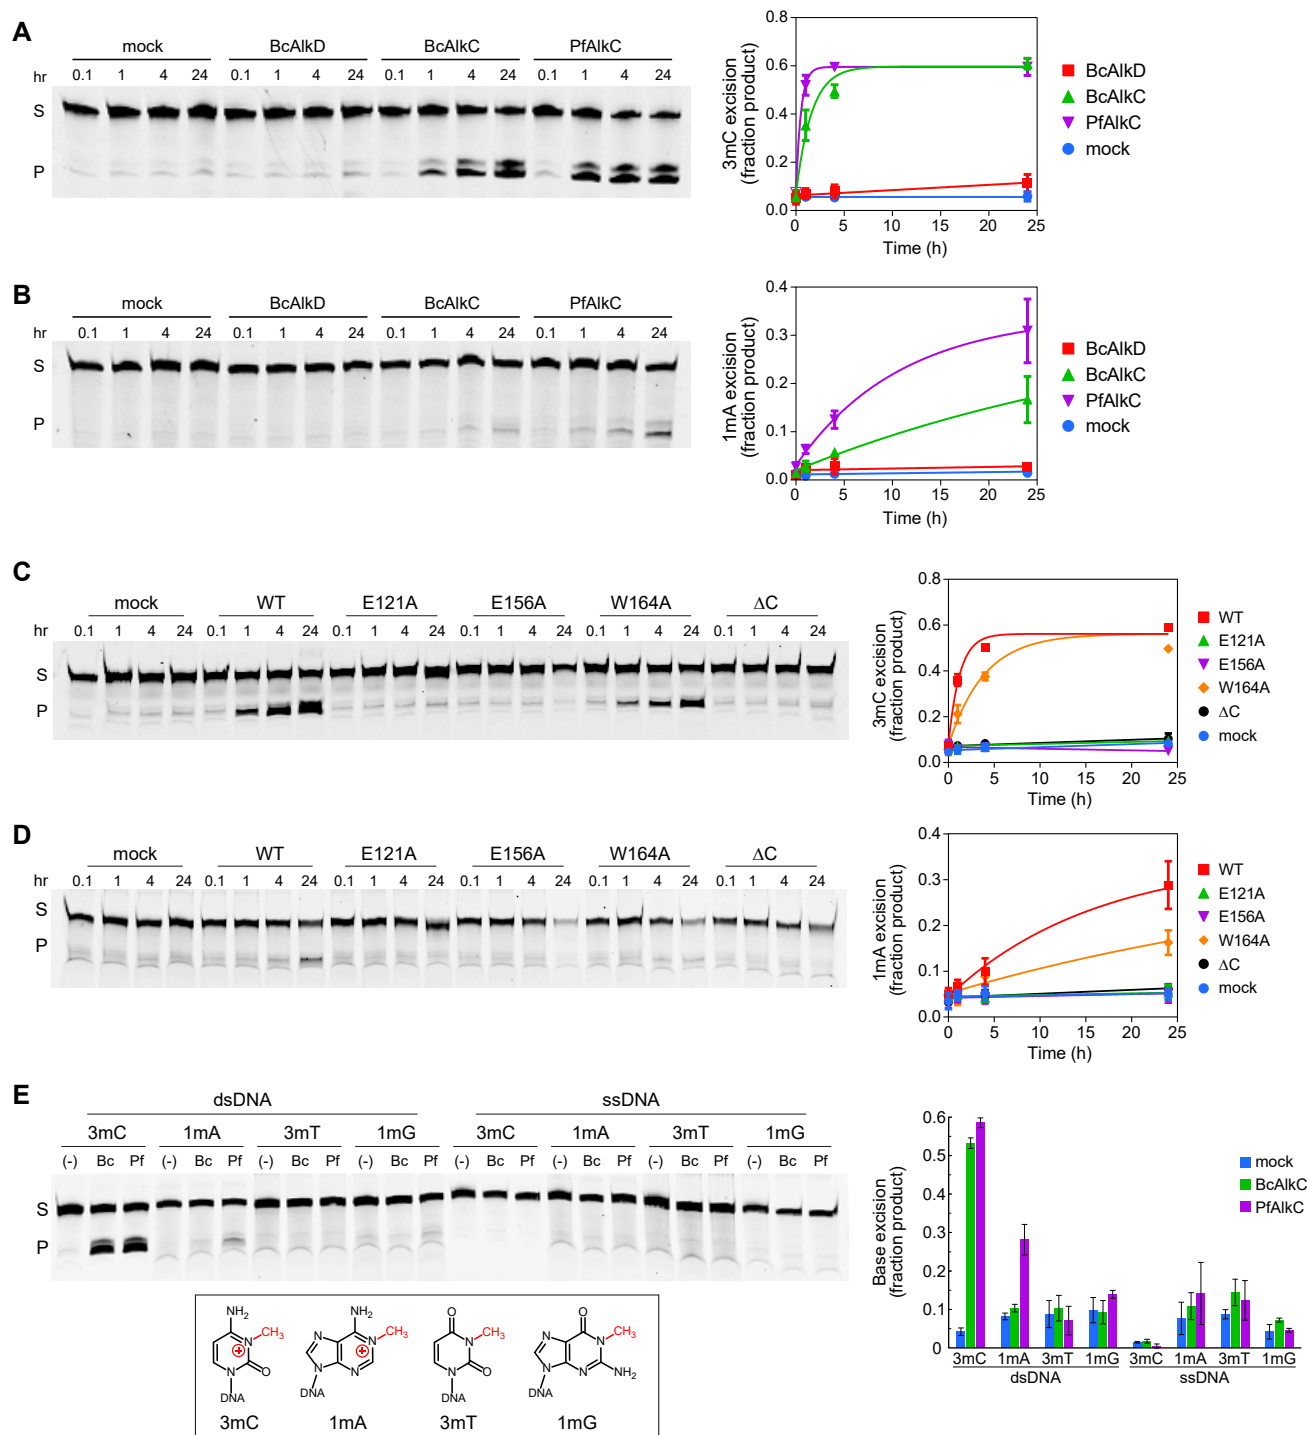

**Appendix Figure S4. AlkC excision of 3mC and 1mA.** Representative denaturing electrophoresis gels show substrate (S) and NaOH-nicked abasic-DNA product (P) over a 24-hour incubation. Values in the plots are mean  $\pm$  SD (n=3). **A,B.** 3mC-DNA (A) and 1mA-DNA (B) excision by no enzyme (mock), BcAlkD, BcAlkC, or PfAlkC. **C,D.** 3mC (C) and 1mA (D) excision by no enzyme (mock), wild-type PfAlkC (WT), or PfAlkC mutants (E121A, E156A, W164A,  $\Delta$ C). **E.** 24-hour incubation of no enzyme [(-), mock], BcAlkC, or PfAlkC with double-stranded (ds) or single-stranded (ss) oligodeoxynucleotides containing a 3mC, 1mA, 1mG, or 3mT modification.

## Appendix References

- Mike LA, Choby JE, Brinkman PR, Olive LQ, Dutter BF, Ivan SJ, Gibbs CM, Sulikowski GA, Stauff DL, Skaar EP (2014) Two-component system cross-regulation integrates *Bacillus anthracis* response to heme and cell envelope stress. *PLoS Pathog* 10(3): e1004044
- Mullins EA, Shi R, Parsons ZD, Yuen PK, David SS, Igarashi Y, Eichman BF (2015) The DNA glycosylase AlkD uses a non-base-flipping mechanism to excise bulky lesions. *Nature* 527(7577): 254-258
- Parsons ZD, Bland JM, Mullins EA, Eichman BF (2016) A catalytic role for C-H/ $\pi$  interactions in base excision repair by *Bacillus cereus* DNA glycosylase AlkD. *J Am Chem Soc* 138(36): 11485-11488
- Rubinson EH, Gowda AS, Spratt TE, Gold B, Eichman BF (2010) An unprecedented nucleic acid capture mechanism for excision of DNA damage. *Nature* 468(7322): 406-411
- Stauff DL, Skaar EP (2009) *Bacillus anthracis* HssRS signalling to HrtAB regulates haem resistance during infection. *Mol Microbiol* 72(3): 763-778
